# Supplementary material for: Cytological DNA methylation for cervical cancer screening: a validation set
Source: Front Oncol. 2023 Aug 21;13:1181982. doi: 10.3389/fonc.2023.1181982 (PMC10475939; doi:10.3389/fonc.2023.1181982)
Supplement: Supplementary file 1 [file Table_1.xlsx]

## Sheet: Data
Supolement 1
The raw data of the study.
Num	Age	Cevical histology before final patholgy	Category EPB41L3	Category JAM3	Methylation in all	Category of hrHPV	Category: major diagnosis	Cateogory: actural cervical pathology	Cateogory: actural cervical pathology withouth other maligancies	Catogory: CIN2+	Category: SCC	Category: HSIL	Category: ADC	Residual lesions	Differentiation CC	Actural pathology of other malignancies	Relative EPB41L3 values (GAPDH minus measured values)	Relative JAM3 values (GAPDH minus measured values)	Cytology results	hrHPV genotyping	HPV genotyping Roche	HPV from other center	Cytology origin	Sampling date	Testing date	DNA concentration (ng/ul)	A260/280	Conversion amount	EPB41L3-GAPDH	EPB41L3 (measured values)	JAM3-GAPDH	JAM3 (measured values)	Major diagnosis	Lable of major diagnosis	Actural cervical pathology
XH0356	51	No	Positive	Positive	Positive	Positive	Other malignancies rather than CC	CIN1								Uterine endometrioid carcinoma, G1	5.34	4.25		66	Other 12			20190623	20190627	95.501	1.87	500ng	35.56	30.22	34.44	30.19	EC	Other malignancies rather than CC	CIN1
XH0357	63	biopsy	Negative	Negative	Negative	Positive	HSIL	Inflammation	Inflammation	Inflammation/LSIL		HSIL without residual lesions		No			11.28	13.11	HSIL	56		56	Other center	20190623	20190716	182.185	1.87	1000ng	37.84	26.56	39.82	26.71	CIN3	HSIL	Inflammation
XH0358	31	biopsy	Negative	Negative	Negative	Positive	HSIL	CIN3	CIN3	CIN2+		HSIL with residual lesions		Yes			9.1	9.5	HSIL	16		16, 52	Other center	20190623	20190716	284.584	1.84	1000ng	35.85	26.75	36.51	27.01	CIN3	HSIL	CIN3
XH0359	54	No	Negative	Negative	Negative	Negative	Benign	Inflammation	Inflammation	Inflammation/LSIL	Benign	Benign	Benign				13.24	12.77		Negative				20190623	20190627	46.752	1.87	500ng	45	31.76	45	32.23	Adenomyosis	Benign	Inflammation
XH0360	64	No	Positive	Positive	Positive	Negative	Other malignancies rather than CC	Inflammation								Uterine endometrioid carcinoma, G3	0.95	1.87		Negative				20190623	20190627	109.547	1.93	500ng	33.94	32.99	35.3	33.43	EC	Other malignancies rather than CC	Inflammation
XH0361	64	No	Negative	Negative	Negative	Negative	Other malignancies rather than CC	Inflammation								Uterine HGSC	9.16	15.09	Negative	Negative			Other center	20190623	20190627	414.065	1.89	500ng	38.67	29.51	45	29.91	EC	Other malignancies rather than CC	Inflammation
XH0362	63	No	Negative	Negative	Negative	Negative	Benign	Inflammation	Inflammation	Inflammation/LSIL	Benign	Benign	Benign				8.64	13.08	Negative	Negative	Negative		Study center	20190623	20190627	723.809	1.9	500ng	40.18	31.54	45	31.92	Ovarian benigh tumor: mucinous type	Benign	Inflammation
XH0363	31	biopsy	Positive	Positive	Positive	Positive	HSIL	CIN3	CIN3	CIN2+		HSIL with residual lesions		Yes			6.39	4.88	LSIL	16		39	Other center	20190623	20190716	217.544	1.84	1000ng	34.57	28.18	33.23	28.35	CIN3	HSIL	CIN3
XH0364	32	biopsy	Positive	Negative	Positive	Positive	HSIL	CIN3	CIN3	CIN2+		HSIL with residual lesions		Yes			7.06	11.72	Negative	16		16, 68, 82	Other center	20190623	20190716	323.718	1.86	1000ng	35.2	28.14	40.17	28.45	CIN3	HSIL	CIN3
XH0365	51	No	Negative	Negative	Negative	Negative	Benign	Inflammation	Inflammation	Inflammation/LSIL	Benign	Benign	Benign				13.59	13.64		Negative				20190623	20190627	64.306	1.88	500ng	45	31.41	45	31.36	Uterine leimyoma	Benign	Inflammation
XH0366	41	biopsy	Positive	Positive	Positive	Positive	HSIL	CIN3	CIN3	CIN2+		HSIL with residual lesions		Yes			4.37	3.47	LSIL	39		39	Other center	20190623	20190716	327.533	1.91	1000ng	32.34	27.97	31.6	28.13	CIN3	HSIL	CIN3
XH0367	34	biopsy	Negative	Negative	Negative	Positive	HSIL	CIN2	CIN2	CIN2+		HSIL with residual lesions		Yes			16.16	15.09	Negative	33		33	Other center	20190623	20190716	261.54	1.9	1000ng	45	28.84	44.01	28.92	CIN2	HSIL	CIN2
XH0368	49	cone	Negative	Negative	Negative	Negative	HSIL	Inflammation	Inflammation	Inflammation/LSIL		HSIL without residual lesions		No			16.31	16.2	HSIL	Negative	Other 12		Other center	20190623	20190716	240.168	1.88	1000ng	45	28.69	45	28.8	CIN3	HSIL	Inflammation
XH0369	52	No	Negative	Negative	Negative	Negative	Benign	Inflammation	Inflammation	Inflammation/LSIL	Benign	Benign	Benign				16.69	16.63		Negative	Negative			20190623	20190627	129.601	1.91	500ng	45	28.31	45	28.37	Uterine leimyoma	Benign	Inflammation
XH0370	43	No	Negative	Negative	Negative	Negative	Benign	Inflammation	Inflammation	Inflammation/LSIL	Benign	Benign	Benign				11.41	11.29		Negative				20190623	20190627	85.152	1.91	500ng	45	33.59	45	33.71	Uterine leimyoma	Benign	Inflammation
XH0371	43	biopsy	Negative	Negative	Negative	Positive	HSIL	CIN1	CIN1	Inflammation/LSIL		HSIL without residual lesions		No			11.48	10.76	Negative	16		16	Other center	20190623	20190716	156.798	1.85	1000ng	38.31	26.83	37.65	26.89	CIN3	HSIL	CIN1
XH0372	55	No	Negative	Negative	Negative	Negative	Other malignancies rather than CC	Inflammation								EIN	12.06	11.04		Negative				20190623	20190627	884.357	1.99	500ng	45	32.94	45	33.96	EIN	Other malignancies rather than CC	Inflammation
XH0373	42	No	Negative	Negative	Negative	Negative	Benign	Inflammation	Inflammation	Inflammation/LSIL	Benign	Benign	Benign				10.79	10.95		Negative				20190623	20190627	336.189	1.92	500ng	45	34.21	45	34.05	Uterine leimyoma	Benign	Inflammation
XH0374	59	cone	Negative	Negative	Negative	Negative	CC	Inflammation	Inflammation	Inflammation/LSIL				No			13.17	13.35	ASC-H	Negative		18, 45	Other center	20190623	20190627	224.052	1.85	500ng	45	31.83	45	31.65	ADC, usual type, middle differentiation	CC	Inflammation
XH0375	62	No	Negative	Negative	Negative	Negative	Other malignancies rather than CC	Inflammation								Ovarian LGSC	14.8	11.61	Negative	Negative	Negative		Study center	20190623	20190627	75.462	1.9	500ng	45	30.2	41.84	30.23	EOC	Other malignancies rather than CC	Inflammation
XH0376	37	biopsy	Positive	Positive	Positive	Positive	HSIL	CIN3	CIN3	CIN2+		HSIL with residual lesions		Yes			4.63	3.78	LSIL	33		33	Other center	20190623	20190716	126.976	1.87	1000ng	31.89	27.26	31.31	27.53	CIN3	HSIL	CIN3
XH0377	31	biopsy	Negative	Negative	Negative	Positive	HSIL	Inflammation	Inflammation	Inflammation/LSIL		HSIL without residual lesions		No			12.46	11.19	ASCUS	16	16, other 12		Other center	20190623	20190716	430.434	1.88	1000ng	39.4	26.94	38.5	27.31	CIN3	HSIL	Inflammation
XH0378	45	biopsy	Negative	Positive	Positive	Negative	HSIL	CIN2	CIN2	CIN2+		HSIL with residual lesions		Yes			16.48	9.17	ASCUS	Negative			Other center	20190623	20190716	459.363	1.92	1000ng	45	28.52	38.05	28.88	CIN3	HSIL	CIN2
XH0379	37	biopsy	Negative	Negative	Negative	Positive	HSIL	CIN2	CIN2	CIN2+		HSIL with residual lesions		Yes			10.29	16.07	ASCUS	18		18	Other center	20190623	20190716	300.438	1.88	1000ng	38.63	28.34	45	28.93	CIN3	HSIL	CIN2
XH0381	37	biopsy	Negative	Negative	Negative	Positive	HSIL	CIN3	CIN3	CIN2+		HSIL with residual lesions		Yes			19.03	13.63	Negative	16		16, 43	Other center	20190623	20190716	384.657	1.87	1000ng	45	25.97	39.85	26.22	CIN3	HSIL	CIN3
XH0382	57	cone	Positive	Positive	Positive	Positive	HSIL	CIN3	CIN3	CIN2+		HSIL with residual lesions		Yes			5.65	8.86		16				20190623	20190716	998.016	1.93	1000ng	32.06	26.41	35.46	26.6	CIN3	HSIL	CIN3
XH0383	64	cone	Negative	Negative	Negative	Positive	HSIL	CIN3	CIN3	CIN2+		HSIL with residual lesions		Yes			9.28	11.25	ASCUS	31		16	Other center	20190623	20190716	754.264	1.9	1000ng	35.49	26.21	37.74	26.49	CIN3	HSIL	CIN3
XH0384	62	cone	Positive	Positive	Positive	Positive	HSIL	CIN3	CIN3	CIN2+		HSIL with residual lesions		Yes			5.54	5.97	ASCUS	16		16	Other center	20190623	20190716	297.404	1.88	1000ng	31.93	26.39	32.61	26.64	CIN3	HSIL	CIN3
XH0385	57	biopsy	Negative	Positive	Positive	Positive	HSIL	CIN3	CIN3	CIN2+		HSIL with residual lesions		Yes			10.42	9.08	HSIL	33		33	Other center	20190623	20190716	676.708	1.9	1000ng	37.72	27.3	36.55	27.47	CIN3	HSIL	CIN3
XH0386	34	No	Negative	Negative	Negative	Negative	Other malignancies rather than CC	Inflammation								Uterine endometrioid carcinoma, G2	14.07	13.98		Negative		Negative		20190623	20190627	37.464	1.83	500ng	45	30.93	45	31.02	EC	Other malignancies rather than CC	Inflammation
XH0387	44	No	Positive	Positive	Positive	Negative	Other malignancies rather than CC	Inflammation								Uterine endometrioid carcinoma, G2	6.13	3.25		Negative				20190623	20190627	175.788	1.94	500ng	36.49	30.36	33.88	30.63	EC	Other malignancies rather than CC	Inflammation
XH0388	59	No	Negative	Negative	Negative	Negative	Other malignancies rather than CC	Inflammation								EIN	13.74	13.28		Negative				20190718	20190719	154.001	1.83	1000ng	39.79	26.05	39.36	26.08	EIN	Other malignancies rather than CC	Inflammation
XH0389	51	No	Positive	Positive	Positive	Negative	Other malignancies rather than CC	Inflammation								Uterine endometrioid carcinoma, G2	4.55	3.06		Negative				20190718	20190719	55.572	1.79	1000ng	31.06	26.51	29.8	26.74	EC	Other malignancies rather than CC	Inflammation
XH0390	47	No	Negative	Positive	Positive	Negative	Other malignancies rather than CC	Inflammation								Uterine endometrioid carcinoma, G1	8.99	8.89	Negative	Negative		53	Other center	20190718	20190719	51.759	1.82	1000ng	35.76	26.77	35.91	27.02	EC	Other malignancies rather than CC	Inflammation
XH0391	55	No	Negative	Positive	Positive	Negative	Other malignancies rather than CC									Uterine clear cell carcinoma	9.4	8.28	Adenocarcinoma, endometrial	Negative		Negative	Other center	20190718	20190719	119.531	1.87	1000ng	36.05	26.65	35.6	27.32	EC	Other malignancies rather than CC	EC, clear cell type
XH0392	51	No	Negative	Negative	Negative	Negative	Other malignancies rather than CC	Inflammation								Uterine HGSC	13.62	11.1		Negative				20190718	20190719	129.501	1.87	1000ng	40	26.38	38	26.9	EC	Other malignancies rather than CC	Inflammation
XH0393	74	No	Negative	Negative	Negative	Negative	Other malignancies rather than CC	Inflammation								Ovarian HGSC	18.9	11.99		Negative				20190718	20190719	31.032	1.81	1000ng	45	26.1	38.38	26.39	EOC	Other malignancies rather than CC	Inflammation
XH0394	43	No	Negative	Negative	Negative	Negative	Other malignancies rather than CC	Inflammation								Ovarian HGSC	11.21	12.92		Negative				20190718	20190719	74.718	1.82	1000ng	38.65	27.44	40.98	28.06	EOC	Other malignancies rather than CC	Inflammation
XH0395	54	No	Negative	Negative	Negative	Negative	Other malignancies rather than CC	Inflammation								Ovarian HGSC	12.46	14.28	Negative	Negative		Negative	Other center	20190718	20190719	111.403	1.82	1000ng	38.75	26.29	40.86	26.58	EOC	Other malignancies rather than CC	Inflammation
XH0396	39	biopsy	Positive	Positive	Positive	Positive	CC	SCC	SCC	CIN2+	SCC with residual lesions			Yes			2.91	2.37	ASCUS	16		16	Other center	20190718	20190719	136.95	1.85	1000ng	29.8	26.89	29.37	27	SCC	CC	SCC
XH0397	29	biopsy	Negative	Positive	Positive	Negative	CC	ADC in situ	ADC in situ	CIN2+			ADC in situ				9.26	6.98	Negative	Negative		18	Other center	20190718	20190719	317.763	1.91	1000ng	37.6	28.34	35.44	28.46	ADC in situ	CC	ADC in situ
XH0399	53	No	Negative	Negative	Negative	Negative	Other malignancies rather than CC	Inflammation								Endometrial stromal sarcoma, high grade	17.59	12.65		Negative				20190718	20190719	52.149	1.77	1000ng	45	27.41	40.5	27.85	Endometrial stromal sarcoma, high grade	Other malignancies rather than CC	Inflammation
XH0400	45	No	Negative	Negative	Negative	Negative	Benign	Inflammation	Inflammation	Inflammation/LSIL	Benign	Benign	Benign				14.99	14.14		Negative		Negative		20190718	20190719	20.733	1.75	200ng	45	30.01	45	30.86	Uterine leimyoma	Benign	Inflammation
XH0401	43	No	Negative	Negative	Negative	Negative	Other malignancies rather than CC	Inflammation								Ovarian HGSC	18.2	10.5	Negative	Negative			Other center	20190718	20190719	57.049	1.79	1000ng	45	26.8	37.47	26.97	EOC	Other malignancies rather than CC	Inflammation
XH0402	55	No	Negative	Negative	Negative	Negative	Other malignancies rather than CC	Inflammation								Ovarian HGSC	9.65	13.27	Negative	Negative		Negative	Other center	20190718	20190719	157.448	1.83	1000ng	36.8	27.15	40.7	27.43	EOC	Other malignancies rather than CC	Inflammation
XH0403	32	biopsy	Positive	Negative	Positive	Negative	HSIL	CIN3	CIN3	CIN2+		HSIL with residual lesions		Yes			6.87	13.19	HSIL	Negative		16	Other center	20190718	20190719	129.099	1.87	1000ng	34.36	27.49	40.87	27.68	CIN3	HSIL	CIN3
XH0404	37	biopsy	Positive	Positive	Positive	Positive	CC	SCC	SCC	CIN2+	SCC with residual lesions			Yes	G2		3.07	3.8	ASCUS	16		16	Other center	20190718	20190719	388.37	1.86	1000ng	31.31	28.24	32.07	28.27	SCC, middle differentiation	CC	SCC
XH0405	54	biopsy	Positive	Positive	Positive	Positive	CC	SCC	SCC	CIN2+	SCC with residual lesions			Yes	G2		3.59	3.75	ASCUS	16		16	Other center	20190718	20190719	104.97	1.82	1000ng	31.74	28.15	31.94	28.19	SCC, middle differentiation	CC	SCC
XH0406	37	biopsy	Negative	Negative	Negative	Positive	HSIL	CIN1	CIN1	Inflammation/LSIL		HSIL without residual lesions		No			15.27	14.94	LSIL	58		58	Other center	20190705	20190707	150.267	1.84	500ng	45	29.73	45	30.06	CIN2	HSIL	CIN1
XH0407	49	biopsy	Negative	Positive	Positive	Negative	HSIL	CIN3	CIN3	CIN2+		HSIL with residual lesions		Yes			9.4	8.56	ASCUS	Negative		31, 59	Other center	20190718	20190719	52.203	1.8	1000ng	36.29	26.89	35.77	27.21	CIN3	HSIL	CIN3
XH0408	62	No	Negative	Positive	Positive	Negative	Other malignancies rather than CC	Inflammation								Uterine endometrioid carcinoma, G2	15.99	5.3	Negative	Negative		Negative	Other center	20190718	20190719	85.007	1.85	1000ng	42.23	26.24	31.59	26.29	EC	Other malignancies rather than CC	Inflammation
XH0409	33	biopsy	Positive	Positive	Positive	Positive	HSIL	CIN3	CIN3	CIN2+		HSIL with residual lesions		Yes			3.93	4.94	HSIL	16		16	Other center	20190718	20190719	73.874	1.84	1000ng	30.27	26.34	31.37	26.43	CIN3	HSIL	CIN3
XH0410	68	No	Negative	Negative	Negative	Negative	Other malignancies rather than CC	Inflammation								Uterine endometrioid carcinoma, G1	18.25	12.8		Negative				20190718	20190719	97.161	1.85	1000ng	45	26.75	39.57	26.77	EC	Other malignancies rather than CC	Inflammation
XH0411	51	biopsy	Negative	Positive	Positive	Positive	HSIL	CIN3	CIN3	CIN2+		HSIL with residual lesions		Yes			9.97	9.02	HSIL	16		16	Other center	20190718	20190719	539.813	1.92	1000ng	37.36	27.39	36.31	27.29	CIN3	HSIL	CIN3
XH0412	44	biopsy	Negative	Negative	Negative	Positive	HSIL	Inflammation	Inflammation	Inflammation/LSIL		HSIL without residual lesions		No			13.99	13.71	LSIL	31, 33, 52, 58		18, 31, 33, 52, 58	Other center	20190705	20190707	92.295	1.9	500ng	45	31.01	45	31.29	CIN2	HSIL	Inflammation
XH0413	43	biopsy	Negative	Negative	Negative	Positive	CC	CIN1	CIN1	Inflammation/LSIL				No			11.8	11.02	LSIL	33	Other 12		Study center	20190718	20190719	134.749	1.91	1000ng	39.72	27.92	38.95	27.93	ADC in situ	CC	CIN1
XH0414	52	No	Negative	Negative	Negative	Negative	Benign	Inflammation	Inflammation	Inflammation/LSIL	Benign	Benign	Benign				16.61	11.75		Negative				20190718	20190719	271.215	1.87	1000ng	45	28.39	40.45	28.7	Uterine leimyoma	Benign	Inflammation
XH0415	56	No	Negative	Positive	Positive	Negative	Other malignancies rather than CC	Inflammation								Uterine endometrioid carcinoma, G1	17.25	7.28		Negative				20190718	20190719	48.026	1.85	1000ng	45	27.75	35.31	28.03	EC	Other malignancies rather than CC	Inflammation
XH0416	61	biopsy	Negative	Negative	Negative	Positive	HSIL	CIN3	CIN3	CIN2+		HSIL with residual lesions		Yes			11.7	9.54	HSIL	16		16	Other center	20190708	20190711	20.18	1.89	200ng	45	33.3	43.29	33.75	CIN3	HSIL	CIN3
XH0417	34	No	Negative	Negative	Negative	Negative	Other malignancies rather than CC	Inflammation								Uterine endometrioid carcinoma, G2	14.04	11.38		Negative				20190703	20190704	124.618	2	500ng	45	30.96	42.3	30.92	EC	Other malignancies rather than CC	Inflammation
XH0418	33	biopsy	Positive	Positive	Positive	Positive	HSIL	CIN3	CIN3	CIN2+		HSIL with residual lesions		Yes			4.77	6.43		16		31, 59		20190708	20190711	119.846	1.9	1000ng	31.51	26.74	33.36	26.93	CIN3	HSIL	CIN3
XH0419	39	biopsy	Positive	Positive	Positive	Positive	HSIL	CIN3	CIN3	CIN2+		HSIL with residual lesions		Yes			6.66	8.71	LSIL	16			Other center	20190708	20190711	241.857	1.88	1000ng	33.81	27.15	36.21	27.5	CIN3	HSIL	CIN3
XH0420	59	biopsy	Positive	Positive	Positive	Negative	HSIL	CIN3	CIN3	CIN2+		HSIL with residual lesions		Yes			5.96	4.89	HSIL	Negative		67	Other center	20190708	20190711	333.183	1.87	1000ng	32.29	26.33	31.54	26.65	CIN3	HSIL	CIN3
XH0421	44	biopsy	Negative	Negative	Negative	Positive	HSIL	CIN3	CIN3	CIN2+		HSIL with residual lesions		Yes			11.09	12.03	ASC-H	16		16	Other center	20190708	20190711	167.494	1.9	1000ng	37.97	26.88	39.52	27.49	CIN3	HSIL	CIN3
XH0422	45	No	Negative	Negative	Negative	Negative	Benign	Inflammation	Inflammation	Inflammation/LSIL	Benign	Benign	Benign				15.56	15.47		Negative				20190703	20190704	52.023	1.84	500ng	45	29.44	45	29.53	Uterine leimyoma	Benign	Inflammation
XH0423	40	No	Negative	Negative	Negative	Negative	Benign	Inflammation	Inflammation	Inflammation/LSIL	Benign	Benign	Benign				10.54	11.29		Negative				20190708	20190711	100.206	1.86	1000ng	38.26	27.72	39.24	27.95	Endometriosis	Benign	Inflammation
XH0424	51	No	Negative	Negative	Negative	Negative	Other malignancies rather than CC	Inflammation								Uterine endometrioid carcinoma, G3	14.5	9.76		Negative				20190705	20190707	38.697	1.79	500ng	45	30.5	40.99	31.23	EC	Other malignancies rather than CC	Inflammation
XH0425	55	No	Positive	Positive	Positive	Negative	Other malignancies rather than CC	Inflammation								Uterine endometrioid carcinoma, G1	1.61	2.36		Negative				20190705	20190707	7.768	1.77	200ng	32.5	30.89	33.68	31.32	EC	Other malignancies rather than CC	Inflammation
XH0426	75	No	Negative	Negative	Negative	Negative	Other malignancies rather than CC	Inflammation								Ovarian borderline tumor, serous-mucinous type	18.25	11.75		Negative				20190708	20190711	55.978	1.83	1000ng	45	26.75	38.93	27.18	Ovarian borderline tumor	Other malignancies rather than CC	Inflammation
XH0428	56	No	Negative	Negative	Negative	Negative	Other malignancies rather than CC	Inflammation								Ovarian HGSC	14.06	16.4		Negative				20190708	20190711	10.238	1.85	200ng	45	30.94	31.69	31.29	EOC	Other malignancies rather than CC	Inflammation
XH0429	40	biopsy	Positive	Positive	Positive	Positive	CC	SCC	SCC	CIN2+	SCC with residual lesions			Yes	G2		3.47	4.15	Negative	16		Negative	Other center	20190708	20190711	52.594	1.8	1000ng	30.99	27.52	31.96	27.81	SCC, middle differentiation	CC	SCC
XH0430	37	No	Negative	Negative	Negative	Negative	Benign	Inflammation	Inflammation	Inflammation/LSIL	Benign	Benign	Benign				15.81	15.69	Negative	Negative	Negative		Study center	20190708	20190711	205.51	1.92	1000ng	45	29.19	45	29.31	Uterine leimyoma	Benign	Inflammation
XH0431	39	No	Negative	Negative	Negative	Negative	Other malignancies rather than CC	Inflammation								Ovarian HGSC	12.12	11.21		Negative				20190705	20190707	252.62	1.95	500ng	45	32.88	45	33.79	EOC	Other malignancies rather than CC	Inflammation
XH0432	39	biopsy	Positive	Positive	Positive	Positive	CC	ADC, usual type	ADC, usual type	CIN2+			ADC, usual type		G1		5.84	4.84	HSIL	16		16	Other center	20190703	20190704	40.777	1.73	500ng	33.88	28.04	32.75	27.91	ADC, usual type, high differentiation	CC	ADC, usual type
XH0433	63	No	Negative	Negative	Negative	Negative	Other malignancies rather than CC	Inflammation								Ovarian HGSC	13.6	13.29		Negative				20190705	20190707	101.605	1.9	500ng	45	31.4	45	31.71	EOC	Other malignancies rather than CC	Inflammation
XH0434	36	biopsy	Positive	Positive	Positive	Positive	CC	SCC	SCC	CIN2+	SCC with residual lesions			Yes			6.75	6.86		16		16, 58		20190703	20190704	37.231	1.86	500ng	35.46	28.71	35.4	28.54	SCC	CC	SCC
XH0435	45	No	Negative	Negative	Negative	Positive	Other malignancies rather than CC	Inflammation								EIN	11.5	9.67	Adenocarcinoma, endometrial	66	Other 12		Study center	20190705	20190707	54.889	1.75	500ng	38.13	26.63	36.41	26.74	EIN	Other malignancies rather than CC	Inflammation
XH0436	32	biopsy	Negative	Positive	Positive	Positive	HSIL	CIN3	CIN3	CIN2+		HSIL with residual lesions		Yes			8.29	9.11	HSIL	58		58	Other center	20190703	20190704	147.394	1.96	500ng	39.68	31.39	40.33	31.22	CIN2	HSIL	CIN3
XH0437	41	biopsy	Positive	Positive	Positive	Positive	CC	SCC	SCC	CIN2+	SCC with residual lesions			Yes	G2		1.49	3.53	HSIL	16			Other center	20190703	20190704	67.252	1.84	500ng	30.47	28.98	32.49	28.96	SCC, middle differentiation	CC	SCC
XH0438	51	biopsy	Positive	Positive	Positive	Positive	HSIL	CIN3	CIN3	CIN2+		HSIL with residual lesions		Yes			0.86	1.23	HSIL	16		16, 58	Other center	20190708	20190711	52.551	1.91	1000ng	31.25	30.39	31.82	30.59	CIN3	HSIL	CIN3
XH0439	39	No	Negative	Negative	Negative	Negative	Benign	Inflammation	Inflammation	Inflammation/LSIL	Benign	Benign	Benign				13.98	13.89		Negative				20190708	20190711	200.86	2.02	1000ng	45	31.02	45	31.11	Adenomyosis	Benign	Inflammation
XH0440	61	No	Negative	Negative	Negative	Negative	Other malignancies rather than CC	Inflammation								Ovarian HGSC (no residual lesions)	15.43	15.07	Negative	Negative			Study center	20190705	20190707	11.215	1.85	200ng	45	29.57	45	29.93	EOC	Other malignancies rather than CC	Inflammation
XH0441	48	No	Positive	Positive	Positive	Negative	Other malignancies rather than CC	Inflammation								Uterine endometrioid carcinoma, G1	5.94	3.7		Negative				20190705	20190707	30.386	1.96	500ng	34.22	28.28	31.86	28.16	EC	Other malignancies rather than CC	Inflammation
XH0442	37	biopsy	Negative	Negative	Negative	Negative	HSIL	CIN1	CIN1	Inflammation/LSIL		HSIL without residual lesions		No			12.33	13.43	LSIL	Negative		52	Other center	20190708	20190711	137.563	1.84	1000ng	38.31	25.98	39.79	26.36	CIN3	HSIL	CIN1
XH0443	41	cone	Positive	Positive	Positive	Positive	CC	SCC	SCC	CIN2+	SCC with residual lesions			Yes	G2		3.5	3.77	Negative	16		16	Other center	20190703	20190704	196.828	1.85	500ng	32	28.5	32.13	28.36	SCC, middle differentiation	CC	SCC
XH0444	41	cone	Positive	Positive	Positive	Positive	CC	SCC	SCC	CIN2+	SCC with residual lesions			Yes	G2		3.97	4.52	ASCUS	16		16, 56, 58	Other center	20190708	20190711	197.29	1.83	1000ng	32.75	28.78	33.28	28.76	SCC, middle differentiation	CC	SCC
XH0445	28	biopsy	Negative	Negative	Negative	Positive	HSIL	CIN3	CIN3	CIN2+		HSIL with residual lesions		Yes			12.29	12.11	HSIL	16		16	Other center	20190708	20190711	21.223	1.88	200ng	45	32.71	45	32.89	CIN3	HSIL	CIN3
XH0446	51	biopsy	Positive	Positive	Positive	Positive	CC	ADC, usual type	ADC, usual type	CIN2+			ADC, usual type		G1		4.4	3.87	Negative	18		18	Other center	20190703	20190704	78.896	1.81	500ng	32.11	27.71	31.47	27.6	ADC, usual type, high differentiation	CC	ADC, usual type
XH0447	39	cone	Negative	Negative	Negative	Negative	CC	Inflammation	Inflammation	Inflammation/LSIL				No			17.37	12.33	ASCUS	Negative		18	Other center	20190703	20190704	69.133	1.81	500ng	45	27.63	40.09	27.76	ADC in situ	CC	Inflammation
XH0448	31	biopsy	Negative	Positive	Positive	Positive	HSIL	CIN3	CIN3	CIN2+		HSIL with residual lesions		Yes			10.21	8.85	HSIL	33		16	Other center	20190708	20190711	142.541	1.93	1000ng	37.15	26.94	36.18	27.33	CIN3	HSIL	CIN3
XH0449	53	No	Negative	Negative	Negative	Negative	Benign	Inflammation	Inflammation	Inflammation/LSIL	Benign	Benign	Benign				15.69	15.72		Negative	Negative			20190708	20190711	33.427	1.96	1000ng	45	29.31	45	29.28	Uterine leimyoma	Benign	Inflammation
XH0450	53	No	Negative	Positive	Positive	Negative	Benign	Inflammation	Inflammation	Inflammation/LSIL	Benign	Benign	Benign				16.44	8.31		Negative				20190703	20190704	26.272	1.93	500ng	45	28.56	37.19	28.88	Cervical cyst	Benign	Inflammation
XH0451	35	biopsy	Negative	Negative	Negative	Negative	CC										10.72	11.09	Negative	Negative	53		Study center	20190708	20190711	45.45	1.84	1000ng	36.93	26.21	37.65	26.56	ADC, mucinous type	CC	ADC, mucinous type
XH0452	29	biopsy	Positive	Positive	Positive	Positive	CC	SCC	SCC	CIN2+	SCC with residual lesions			Yes			5.21	4.16	HSIL	16		16	Other center	20190708	20190711	76.167	1.87	1000ng	30.96	25.75	30.22	26.06	SCC	CC	SCC
XH0453	35	biopsy	Negative	Negative	Negative	Positive	HSIL	CIN2	CIN2	CIN2+		HSIL with residual lesions		Yes			8.83	11.7	Negative	16		16, 18	Other center	20190708	20190711	116.316	1.86	1000ng	34.79	25.96	37.79	26.09	CIN3	HSIL	CIN2
XH0454	40	biopsy	Negative	Positive	Positive	Positive	HSIL	CIN3	CIN3	CIN2+		HSIL with residual lesions		Yes			9.7	8.79	Negative	58		58	Other center	20190708	20190711	224.38	1.91	1000ng	36.58	26.88	35.73	26.94	CIN3	HSIL	CIN3
XH0455	52	No	Negative	Negative	Negative	Negative	Other malignancies rather than CC	Inflammation								Ovarian carcinosarcoma	10.58	12.33		Negative				20190705	20190707	13.934	1.8	200ng	39.37	28.79	41.01	28.68	EOC	Other malignancies rather than CC	Inflammation
XH0456	33	biopsy	Negative	Positive	Positive	Positive	CC	ADC, villoglandular	ADC, villoglandular	CIN2+			ADC, villoglandular				17.41	6.29	ASC-H	16		16, 18	Other center	20190708	20190711	62.93	1.85	1000ng	45	27.59	33.86	27.57	ADC, villoglandular	CC	ADC, villoglandular
XH0457	51	cone	Positive	Positive	Positive	Positive	HSIL	CIN3	CIN3	CIN2+		HSIL with residual lesions		Yes			5.47	6.1	HSIL	16			Other center	20190708	20190711	147.02	1.86	1000ng	31.42	25.95	32.26	26.16	CIN3	HSIL	CIN3
XH0458	48	No	Negative	Negative	Negative	Negative	Other malignancies rather than CC	Inflammation								Uterine endometrioid carcinoma, G1	15.09	15.29	Negative	Negative		Negative	Other center	20190705	20190707	37.291	1.77	500ng	45	29.91	45	29.71	EC	Other malignancies rather than CC	Inflammation
XH0459	65	No	Negative	Negative	Negative	Negative	Other malignancies rather than CC	Inflammation								Ovarian HGSC	10.52	12.75		Negative				20190705	20190707	32.721	1.82	500ng	39.09	28.57	41.42	28.67	EOC	Other malignancies rather than CC	Inflammation
XH0460	47	cone	Negative	Positive	Positive	Negative	CC	SCC	SCC	CIN2+	SCC with residual lesions			Yes			8.11	9.11	Negative	Negative		16	Other center	20190718	20190719	138.509	1.84	1000ng	36.24	28.13	37.59	28.48	SCC	CC	SCC
XH0461	66	No	Negative	Negative	Negative	Negative	Benign	Inflammation	Inflammation	Inflammation/LSIL	Benign	Benign	Benign				9.57	12.57		Negative	Negative			20190718	20190719	145.675	1.86	1000ng	36.91	27.34	40.1	27.53	Ovarian benigh tumor: mucinous type	Benign	Inflammation
XH0462	58	biopsy	Negative	Negative	Negative	Negative	CC	Inflammation	Inflammation	Inflammation/LSIL				No			12.97	13.78	Negative	Negative		Negative	Other center	20190718	20190719	155.275	1.87	1000ng	40.39	27.42	41.39	27.61	ADC, small cell type	CC	Inflammation
XH0463	41	No	Negative	Negative	Negative	Negative	Other malignancies rather than CC	Inflammation								Uterine endometrioid carcinoma, G1	11.75	11.85	Negative	Negative		Postiviet without genotyping	Other center	20190705	20190707	178.601	1.93	500ng	45	33.25	45	33.15	EC	Other malignancies rather than CC	Inflammation
XH0464	22	No	Negative	Negative	Negative	Negative	Other malignancies rather than CC	Inflammation								Ovarian LGSC	16.55	16.52		Negative	Negative			20190718	20190719	61.83	1.81	1000ng	45	28.45	45	28.48	EOC	Other malignancies rather than CC	Inflammation
XH0465	50	biopsy	Positive	Positive	Positive	Positive	HSIL	CIN3	CIN3	CIN2+		HSIL with residual lesions		Yes			6.89	7.22	ASCUS	31		Postiviet without genotyping	Other center	20190718	20190719	88.738	1.85	1000ng	35.52	28.63	35.94	28.72	CIN3	HSIL	CIN3
XH0466	55	No	Negative	Positive	Positive	Negative	Other malignancies rather than CC	Inflammation								Uterine endometrioid carcinoma, G1	11.52	5.29		Negative				20190705	20190707	31.803	1.91	500ng	45	33.48	38.94	33.65	EC	Other malignancies rather than CC	Inflammation
XH0467	50	No	Negative	Negative	Negative	Negative	Benign	Inflammation	Inflammation	Inflammation/LSIL	Benign	Benign	Benign				17.03	16.68	Negative	Negative		Negative	Other center	20190703	20190704	42.631	1.84	500ng	45	27.97	45	28.32	Uterine leimyoma	Benign	Inflammation
XH0468	40	biopsy	Negative	Negative	Negative	Positive	HSIL	CIN1	CIN1	Inflammation/LSIL		HSIL without residual lesions		No			8.3	9.76	HSIL	16		16	Other center	20190718	20190719	211.64	1.84	1000ng	35.33	27.03	36.99	27.23	CIN3	HSIL	CIN1
XH0469	51	No	Negative	Positive	Positive	Negative	Other malignancies rather than CC	Inflammation								Ovarian HGSC	9.76	8.96	Negative	Negative		Negative	Other center	20190705	20190707	57.215	1.95	500ng	45	35.24	45	36.04	EOC	Other malignancies rather than CC	Inflammation
XH0470	48	No	Negative	Negative	Negative	Negative	Benign	Inflammation	Inflammation	Inflammation/LSIL	Benign	Benign	Benign				17.72	13.71		Negative	Negative			20190718	20190719	38.298	1.83	1000ng	45	27.28	40.92	27.21	Uterine leimyoma	Benign	Inflammation
XH0471	54	biopsy	Negative	Negative	Negative	Negative	HSIL	CIN1	CIN1	Inflammation/LSIL		HSIL without residual lesions		No			13.54	9.58	HSIL	Negative		16	Other center	20190718	20190719	86.978	1.86	1000ng	40.61	27.07	36.45	26.87	CIN3	HSIL	CIN1
XH0473	39	No	Negative	Negative	Negative	Negative	Other malignancies rather than CC	Inflammation								Endometrial stromal sarcoma, high grade	11.68	11.53		Negative				20190705	20190707	77.994	1.88	500ng	45	33.32	45	33.47	Endometrial stromal sarcoma, high grade	Other malignancies rather than CC	Inflammation
XH0475	63	No	Negative	Negative	Negative	Negative	Other malignancies rather than CC	Inflammation								Ovarian endometrioid carcinoma, G1	12.61	10.65		Negative	Negative			20190718	20190724	35.124	1.91	1000ng	40.83	28.22	39.34	28.69	EOC	Other malignancies rather than CC	Inflammation
XH0476	40	No	Negative	Positive	Positive	Negative	Other malignancies rather than CC	Inflammation								Ovarian endometrioid carcinoma, G3	8.19	8.08		Negative	Negative			20190705	20190707	7.323	1.8	200ng	45	36.81	45	36.92	EOC	Other malignancies rather than CC	Inflammation
XH0477	58	biopsy	Negative	Positive	Positive	Positive	HSIL	CIN2	CIN2	CIN2+		HSIL with residual lesions		Yes			9.2	8.72		16	Negative			20190718	20190724	224.61	1.88	1000ng	37.28	28.08	37.05	28.33	CIN3	HSIL	CIN2
XH0478	34	cone	Negative	Negative	Negative	Positive	CC	Inflammation	Inflammation	Inflammation/LSIL	SCC without residual lesions			No			17.04	15.16	ASCUS	16		16	Other center	20190718	20190724	245.803	1.86	1000ng	45	27.96	43.89	28.73	SCC	CC	Inflammation
XH0479	62	No	Negative	Negative	Negative	Negative	Other malignancies rather than CC	Inflammation								Uterine endometrioid carcinoma, G2	9.74	10.2	Negative	Negative		Negative	Other center	20190705	20190707	147.691	1.87	500ng	45	35.26	45	34.8	EC	Other malignancies rather than CC	Inflammation
XH0480	45	biopsy	Negative	Positive	Positive	Positive	CC	SCC	SCC	CIN2+	SCC with residual lesions			Yes	G1		7.96	7.53	Negative	16		18	Other center	20190718	20190724	298.907	1.84	1000ng	35.36	27.4	34.93	27.4	SCC, high differentiation	CC	SCC
XH0481	46	biopsy	Negative	Negative	Negative	Positive	HSIL	CIN1	CIN1	Inflammation/LSIL		HSIL without residual lesions		No			10.67	12.42		59	59			20190722	20190724	208.568	1.92	1000ng	39.2	28.53	40.92	28.5	CIN3	HSIL	CIN1
XH0482	57	cone	Negative	Negative	Negative	Negative	CC	Inflammation	Inflammation	Inflammation/LSIL	SCC without residual lesions			No			9.27	13.65		Negative				20190722	20190724	75.105	1.8	1000ng	36.92	27.65	41.44	27.79	SCC	CC	Inflammation
XH0483	47	No	Positive	Positive	Positive	Negative	Other malignancies rather than CC	Inflammation								Uterine endometrioid carcinoma, G1	0.95	1.01	Negative	Negative		Negative	Other center	20190705	20190707	113.759	1.84	500ng	34.38	33.43	34.98	33.97	EC	Other malignancies rather than CC	Inflammation
XH0484	32	biopsy	Negative	Negative	Negative	Negative	CC	Inflammation	Inflammation	Inflammation/LSIL	SCC without residual lesions			No			17.81	13.23	ASCUS	Negative		16	Other center	20190722	20190724	95.527	1.87	1000ng	45	27.19	40	26.77	SCC	CC	Inflammation
XH0485	62	No	Negative	Negative	Negative	Negative	Benign	Inflammation	Inflammation	Inflammation/LSIL	Benign	Benign	Benign				8.65	12.79		Negative				20190722	20190724	259.633	1.92	1000ng	36.31	27.66	40.25	27.46	Endometriosis	Benign	Inflammation
XH0486	48	biopsy	Positive	Negative	Positive	Positive	HSIL	CIN3	CIN3	CIN2+		HSIL with residual lesions		Yes			7.37	13.59	HSIL	58, 31		31	Other center	20190703	20190704	108.567	1.94	500ng	37.85	30.48	45	31.41	CIN2	HSIL	CIN3
XH0487	33	biopsy	Positive	Positive	Positive	Positive	CC	ADC in situ	ADC in situ	CIN2+			ADC in situ				7.64	4.37	HSIL	18		18, 52	Other center	20190722	20190724	86.603	1.85	1000ng	35.73	28.09	31.97	27.6	ADC in situ	CC	ADC in situ
XH0488	63	No	Negative	Negative	Negative	Negative	Other malignancies rather than CC	Inflammation								Ovarian mucinous carcinoma	11.73	11.65		Negative				20190705	20190707	41.854	1.87	500ng	45	33.27	45	33.35	EOC	Other malignancies rather than CC	Inflammation
XH0489	49	No	Positive	Positive	Positive	Negative	Other malignancies rather than CC	Inflammation								Uterine endometrioid carcinoma, G1	6.45	7.73		Negative				20190705	20190707	14.285	1.81	200ng	45	38.55	45	37.27	EC	Other malignancies rather than CC	Inflammation
XH0490	48	biopsy	Positive	Negative	Positive	Positive	HSIL	CIN2	CIN2	CIN2+		HSIL with residual lesions		Yes			6.11	12.92	ASC-H	58	58		Study center	20190703	20190704	89.898	1.87	500ng	37.8	31.69	45	32.08	CIN2	HSIL	CIN2
XH0491	56	No	Negative	Negative	Negative	Negative	Other malignancies rather than CC	Inflammation								Uterine HGSC and undifferentiated carcinoma	12.89	12.84		Negative				20190705	20190707	27.478	2.01	500ng	45	32.11	45	32.16	EC	Other malignancies rather than CC	Inflammation
XH0492	28	cone	Positive	Positive	Positive	Positive	CC	ADC in situ	ADC in situ	CIN2+			ADC in situ				3.39	3.66	ASCUS	16		16, 52, 35	Other center	20190722	20190724	79.709	1.85	1000ng	31.31	27.92	31.32	27.66	ADC in situ	CC	ADC in situ
XH0493	44	biopsy	Positive	Positive	Positive	Positive	CC	ADC, usual type	ADC, usual type	CIN2+			ADC, usual type		G3		1.11	8.77	Adenocarcinoma, endocervical	16	16		Study center	20190703	20190704	4.346	1.75	100ng	38.67	37.56	45	36.23	ADC, usual type, middle-low differentiation	CC	ADC, usual type
XH0494	60	No	Negative	Negative	Negative	Negative	Benign	Inflammation	Inflammation	Inflammation/LSIL	Benign	Benign	Benign				11.67	13.29		Negative				20190722	20190724	89.77	1.86	1000ng	38.97	27.3	40.45	27.16	Uterine leimyoma	Benign	Inflammation
XH0495	39	biopsy	Positive	Positive	Positive	Positive	HSIL	CIN3	CIN3	CIN2+		HSIL with residual lesions		Yes			4.64	5.53	ASC-H	35		35	Other center	20190705	20190707	99.082	1.86	500ng	34.65	30.01	35.56	30.03	CIN3	HSIL	CIN3
XH0496	41	biopsy	Negative	Positive	Positive	Positive	HSIL	CIN3	CIN3	CIN2+		HSIL with residual lesions		Yes			14.17	5.17	HSIL	16			Other center	20190722	20190724	24.478	1.91	200ng	45	30.83	35.79	30.62	CIN3	HSIL	CIN3
XH0497	62	No	Negative	Positive	Positive	Negative	Benign	Inflammation	Inflammation	Inflammation/LSIL	Benign	Benign	Benign				9.76	8.27		Negative	Negative			20190703	20190704	75.022	1.88	500ng	42.29	32.53	41.23	32.96	Uterine leimyoma	Benign	Inflammation
XH0498	25	No	Negative	Negative	Negative	Negative	Benign	Inflammation	Inflammation	Inflammation/LSIL	Benign	Benign	Benign				17.05	13.05		Negative				20190722	20190724	169.045	1.95	1000ng	45	27.95	40.9	27.85	Ovarian benigh tumor: mucinous type	Benign	Inflammation
XH0499	57	No	Negative	Negative	Negative	Negative	Other malignancies rather than CC	Inflammation								Ovarian HGSC	11.61	11.59		Negative				20190705	20190707	70.924	1.88	500ng	45	33.39	45	33.41	EOC	Other malignancies rather than CC	Inflammation
XH0500	33	biopsy	Negative	Negative	Negative	Negative	HSIL	CIN2	CIN2	CIN2+		HSIL with residual lesions		Yes			13.41	13.69	ASCUS	Negative		18	Other center	20190722	20190724	66.641	1.85	1000ng	39.71	26.3	39.95	26.26	CIN3	HSIL	CIN2
XH0501	66	No	Negative	Negative	Negative	Negative	Benign	Inflammation	Inflammation	Inflammation/LSIL	Benign	Benign	Benign				10.45	12.19		Negative	Negative			20190722	20190724	84.222	1.88	1000ng	37.02	26.57	38.87	26.68	Ovarian benigh tumor: lipoleiomyoma	Benign	Inflammation
XH0502	29	biopsy	Negative	Negative	Negative	Positive	HSIL	CIN3	CIN3	CIN2+		HSIL with residual lesions		Yes			17.66	13.14	HSIL	52		16	Other center	20190722	20190724	50.341	1.84	1000ng	45	27.34	40.48	27.34	CIN3	HSIL	CIN3
XH0503	68	cone	Negative	Negative	Negative	Positive	HSIL	Inflammation	Inflammation	Inflammation/LSIL		HSIL without residual lesions		No			9	10.62	LSIL	31	Other 12		Study center	20190722	20190724	217.298	1.92	1000ng	37.98	28.98	39.85	29.23	CIN3	HSIL	Inflammation
XH0504	51	cone	Negative	Negative	Negative	Positive	CC	Inflammation	Inflammation	Inflammation/LSIL	SCC without residual lesions			No			12.14	11.99	Negative	16	16		Study center	20190703	20190704	325.045	1.91	500ng	45	32.86	45	33.01	SCC	CC	Inflammation
XH0505	31	biopsy	Negative	Negative	Negative	Negative	HSIL	Inflammation	Inflammation	Inflammation/LSIL		HSIL without residual lesions		No			11.62	17.71	LSIL	Negative		16	Other center	20190722	20190724	233.555	1.89	1000ng	38.46	26.84	45	27.29	CIN3	HSIL	Inflammation
XH0506	32	cone	Negative	Negative	Negative	Positive	CC	Inflammation	Inflammation	Inflammation/LSIL	SCC without residual lesions			No			10.51	10.96	ASCUS	18		18	Other center	20190703	20190704	254.781	1.94	500ng	45	34.49	45	34.04	SCC, middle differentiation	CC	Inflammation
XH0507	41	biopsy	Negative	Negative	Negative	Positive	HSIL	CIN1	CIN1	Inflammation/LSIL		HSIL without residual lesions		No			12.28	14.85	LSIL	18		18	Other center	20190722	20190724	102.623	1.88	1000ng	39.94	27.66	42.25	27.4	CIN3	HSIL	CIN1
XH0508	44	biopsy	Negative	Negative	Negative	Positive	HSIL	CIN2	CIN2	CIN2+		HSIL with residual lesions		Yes			12.57	12.27		16, 56				20190703	20190704	82.608	1.88	500ng	45	32.43	45	32.73	CIN2	HSIL	CIN2
XH0509	51	No	Negative	Negative	Negative	Negative	Other malignancies rather than CC									Vagina melanoma	8.72	14.89		Negative				20190705	20190707	51.312	1.92	500ng	38.44	29.72	44.84	29.95	Vagina melanoma	Other malignancies rather than CC	Melanoma
XH0510	37	biopsy	Negative	Negative	Negative	Negative	CC	Inflammation	Inflammation	Inflammation/LSIL	SCC without residual lesions			No			15.84	11.2	LSIL	Negative		16	Other center	20190722	20190724	119.503	1.91	1000ng	45	29.16	40.23	29.03	SCC	CC	Inflammation
XH0511	49	No	Negative	Negative	Negative	Negative	Other malignancies rather than CC	Inflammation								Ovarian HGSC	15.84	16.04		Negative	Negative			20190722	20190724	541.462	1.97	1000ng	45	29.16	45	28.96	EOC	Other malignancies rather than CC	Inflammation
XH0512	36	biopsy	Positive	Positive	Positive	Positive	HSIL	CIN3	CIN3	CIN2+		HSIL with residual lesions		Yes			4.04	6.83	ASCUS	16			Other center	20190722	20190724	57.196	1.84	1000ng	33.78	29.74	36.54	29.71	CIN3	HSIL	CIN3
XH0513	40	biopsy	Negative	Negative	Negative	Positive	HSIL	CIN3	CIN3	CIN2+		HSIL with residual lesions		Yes			9.84	10.21	Negative	16		16, 68	Other center	20190722	20190724	143.892	1.92	1000ng	37.04	27.2	37.42	27.21	CIN3	HSIL	CIN3
XH0514	41	biopsy	Negative	Negative	Negative	Positive	HSIL	CIN2	CIN2	CIN2+		HSIL with residual lesions		Yes			10.46	12.97	Negative	33		33	Other center	20190722	20190724	233.307	1.84	1000ng	36.75	26.29	39.35	26.38	CIN3	HSIL	CIN2
XH0515	58	No	Negative	Negative	Negative	Negative	Other malignancies rather than CC	Inflammation								Uterine leiomyosarcoma	17.46	14.56		Negative				20190705	20190707	29.587	1.82	500ng	45	27.54	42.51	27.95	Uterine leiomyosarcoma	Other malignancies rather than CC	Inflammation
XH0516	66	No	Negative	Negative	Negative	Negative	Other malignancies rather than CC	Inflammation								Ovarian HGSC	16.33	10.31		Negative				20190703	20190704	27.11	1.97	500ng	45	28.67	39.14	28.83	EOC	Other malignancies rather than CC	Inflammation
XH0517	61	biopsy	Negative	Positive	Positive	Positive	CC	ADC, usual type	ADC, usual type	CIN2+			ADC, usual type		G1		8.45	6.91	Adenocarcinoma, endocervical	16		16	Other center	20190703	20190704	96.988	1.88	500ng	35.88	27.43	34.52	27.61	ADC, usual type, high differentiation	CC	ADC, usual type
XH0518	33	No	Negative	Negative	Negative	Negative	Other malignancies rather than CC	Inflammation								Ovarian borderline tumor, endometrioid type	10.39	12.42		Negative				20190722	20190724	51.732	1.83	1000ng	37.22	26.83	39.42	27	Ovarian borderline tumor	Other malignancies rather than CC	Inflammation
XH0519	45	cone	Negative	Negative	Negative	Negative	CC	ADC in situ	ADC in situ	CIN2+			ADC in situ				11.59	11.5	ASCUS	Negative		18, 52	Other center	20190726	20190729	39.519	1.82	1000ng	37.68	26.09	37.62	26.12	ADC in situ	CC	ADC in situ
XH0520	51	No	Negative	Negative	Negative	Negative	Other malignancies rather than CC	Inflammation								Ovarian HGSC	18.83	14.96		Negative	Negative			20190726	20190729	72.179	1.84	1000ng	45	26.17	41.24	26.28	EOC	Other malignancies rather than CC	Inflammation
XH0521	49	No	Negative	Negative	Negative	Negative	Other malignancies rather than CC	Inflammation								EIN	10.86	12.17		Negative				20190726	20190729	180.979	1.89	1000ng	38.01	27.15	39.8	27.63	EIN	Other malignancies rather than CC	Inflammation
XH0522	45	No	Negative	Negative	Negative	Negative	Benign	Inflammation	Inflammation	Inflammation/LSIL	Benign	Benign	Benign				17.85	15.5		Negative				20190726	20190729	110.124	1.92	1000ng	45	27.15	43.08	27.58	Endometrial complex hyperplasia	Benign	Inflammation
XH0523	39	biopsy	Negative	Negative	Negative	Positive	HSIL	Inflammation	Inflammation	Inflammation/LSIL		HSIL without residual lesions		No			17.66	13.31		16		16		20190726	20190729	230.862	1.9	1000ng	45	27.34	41.25	27.94	CIN3	HSIL	Inflammation
XH0524	53	No	Negative	Negative	Negative	Negative	Benign	Inflammation	Inflammation	Inflammation/LSIL	Benign	Benign	Benign				17.52	17.27	Negative	Negative	Negative		Study center	20190726	20190729	47.702	1.84	1000ng	45	27.48	45	27.73	Pelvic tuberculosis	Benign	Inflammation
XH0525	68	No	Negative	Negative	Negative	Negative	Other malignancies rather than CC	Inflammation								Uterine endometrioid carcinoma, G2	15.71	15.78		Negative	Negative			20190726	20190729	12.987	1.82	200ng	45	29.29	45	29.22	EC	Other malignancies rather than CC	Inflammation
XH0526	51	biopsy	Negative	Positive	Positive	Negative	CC	ADC, villoglandular	ADC, villoglandular	CIN2+			ADC, villoglandular				8.98	8.4		Negative				20190726	20190729	19.487	1.81	200ng	37.28	28.3	37.01	28.61	ADC, villoglandular	CC	ADC, villoglandular
XH0527	67	No	Negative	Negative	Negative	Negative	Other malignancies rather than CC	Inflammation								Ovarian borderline tumor, mucinous type	11.36	14.27		Negative	Negative			20190726	20190729	40.644	1.87	1000ng	37.5	26.14	40.18	25.91	Ovarian borderline tumor	Other malignancies rather than CC	Inflammation
XH0528	40	biopsy	Negative	Positive	Positive	Positive	HSIL	CIN3	CIN3	CIN2+		HSIL with residual lesions		Yes			13.56	6.79	ASCUS	16		16	Other center	20190726	20190729	121.329	1.86	1000ng	39.64	26.08	32.64	25.85	CIN3	HSIL	CIN3
XH0529	55	cone	Negative	Negative	Negative	Positive	HSIL	CIN2	CIN2	CIN2+		HSIL with residual lesions		Yes			19.07	14.64	LSIL	16	16		Study center	20190726	20190729	253.619	1.84	1000ng	45	25.93	40.26	25.62	CIN3	HSIL	CIN2
XH0530	52	No	Negative	Negative	Negative	Positive	Other malignancies rather than CC	Inflammation								Ovarian granular cell tumor	16.85	17.12		58				20190726	20190729	138.441	1.95	1000ng	45	28.15	45	27.88	Ovarian granular cell tumor	Other malignancies rather than CC	Inflammation
XH0531	51	cone	Negative	Positive	Positive	Positive	CC	ADC, usual type	ADC, usual type	CIN2+			ADC, usual type		G1		8.72	7.79	ASCUS	16		16, 53	Other center	20190726	20190729	189.734	1.83	1000ng	35.22	26.5	33.77	25.98	ADC, usual type, high differentiation	CC	ADC, usual type
XH0532	35	cone	Negative	Negative	Negative	Negative	CC	Inflammation	Inflammation	Inflammation/LSIL	SCC without residual lesions			No			18.74	11.23	ASC-H	Negative		16	Other center	20190726	20190729	554.005	1.9	1000ng	45	26.26	37.22	25.99	SCC	CC	Inflammation
XH0533	62	No	Negative	Positive	Positive	Negative	Other malignancies rather than CC	Inflammation								Uterine endometrioid carcinoma, G2	11.37	4.17		Negative				20190726	20190729	182.881	1.84	1000ng	37.12	25.75	29.62	25.45	EC	Other malignancies rather than CC	Inflammation
XH0534	47	biopsy	Negative	Negative	Negative	Positive	HSIL	CIN1	CIN1	Inflammation/LSIL		HSIL without residual lesions		No			12.39	14.49	ASCUS	58		58, 66	Other center	20190726	20190729	91.656	1.86	1000ng	38.97	26.58	40.85	26.36	CIN2	HSIL	CIN1
XH0535	30	biopsy	Negative	Negative	Negative	Positive	HSIL	CIN2	CIN2	CIN2+		HSIL with residual lesions		Yes			17.96	17.48	ASCUS	31		31	Other center	20190726	20190729	65.525	1.84	1000ng	45	27.04	45	27.52	CIN2	HSIL	CIN2
XH0536	66	No	Positive	Positive	Positive	Negative	Other malignancies rather than CC	Inflammation								Uterine endometrioid carcinoma, G2	3.66	2.06	Negative	Negative		Negative	Other center	20190726	20190729	64.853	1.82	1000ng	30.19	26.53	28.85	26.79	EC	Other malignancies rather than CC	Inflammation
XH0537	71	No	Negative	Negative	Negative	Positive	Other malignancies rather than CC	Inflammation								Ovarian HGSC	12.04	13.27		58, 66				20190726	20190729	29.234	1.84	1000ng	38.16	26.12	39.72	26.45	EOC	Other malignancies rather than CC	Inflammation
XH0538	57	No	Negative	Negative	Negative	Negative	Benign	Inflammation	Inflammation	Inflammation/LSIL	Benign	Benign	Benign				15.75	15.29	Negative	Negative		Negative	Other center	20190726	20190729	15.756	1.78	200ng	45	29.25	45	29.71	Ovarian benigh tumor: serous type	Benign	Inflammation
XH0539	41	No	Negative	Negative	Negative	Negative	Other malignancies rather than CC	Inflammation								Fallopian tube carcinoma	19.43	10.17		Negative				20190726	20190729	161.564	1.85	1000ng	45	25.57	35.97	25.8	EOC	Other malignancies rather than CC	Inflammation
XH0540	33	biopsy	Positive	Positive	Positive	Positive	CC	SCC	SCC	CIN2+	SCC with residual lesions			Yes	G2		5.36	4.68	SCC	16		16	Other center	20190726	20190729	336.45	1.85	1000ng	30.51	25.15	30.06	25.38	SCC, high-middle differentiation	CC	SCC
XH0541	33	biopsy	Positive	Positive	Positive	Positive	CC	SCC	SCC	CIN2+	SCC with residual lesions			Yes	G2		5.31	5.41	ASC-H	16		16, 18, 其余12种	Other center	20190726	20190729	64.426	1.8	1000ng	31.47	26.16	31.65	26.24	SCC, middle differentiation	CC	SCC
XH0542	37	No	Negative	Negative	Negative	Negative	Other malignancies rather than CC	Inflammation								Uterine endometrioid carcinoma, G2	9.5	12.75		Negative				20190726	20190729	176.579	1.87	1000ng	35.92	26.42	39.3	26.55	EC	Other malignancies rather than CC	Inflammation
XH0543	71	No	Negative	Negative	Negative	Negative	Other malignancies rather than CC	Inflammation								Ovarian HGSC	14.85	15.08		Negative				20190730	20190731	92.755	1.86	1000ng	45	30.15	45	29.92	EOC	Other malignancies rather than CC	Inflammation
XH0544	70	No	Negative	Negative	Negative	Negative	Other malignancies rather than CC	Inflammation								Ovarian HGSC	10.81	10.35	Negative	Negative		Negative	Other center	20190730	20190731	26.609	1.91	500ng	45	34.19	45	34.65	EOC	Other malignancies rather than CC	Inflammation
XH0545	45	cone	Negative	Negative	Negative	Negative	CC	Inflammation	Inflammation	Inflammation/LSIL	SCC without residual lesions			No			15.98	11.66	ASCUS	Negative			Other center	20190730	20190731	183.118	1.83	1000ng	45	29.02	41.06	29.4	SCC	CC	Inflammation
XH0546	44	biopsy	Positive	Positive	Positive	Positive	CC	SCC	SCC	CIN2+	SCC with residual lesions			Yes	G3		2.6	2.96	ASCUS	16		16	Other center	20190730	20190731	157.003	1.85	1000ng	31.06	28.46	31.52	28.56	SCC, low differentiation	CC	SCC
XH0547	54	No	Positive	Positive	Positive	Negative	Other malignancies rather than CC	Inflammation								Ovarian HGSC	6.17	5.24		Negative				20190730	20190731	0.444	0.76	1000ng	45	38.83	45	39.76	EOC	Other malignancies rather than CC	Inflammation
XH0548	36	No	Negative	Positive	Positive	Negative	Other malignancies rather than CC	Inflammation								Uterine endometrioid carcinoma, G2	14.78	9.05	Negative	Negative		Negative	Other center	20190730	20190731	91.586	1.84	1000ng	45	30.22	39.3	30.25	EC	Other malignancies rather than CC	Inflammation
XH0549	45	cone	Positive	Positive	Positive	Positive	CC	SCC	SCC	CIN2+	SCC with residual lesions			Yes	G2		0.34	2.21	HSIL	16		16	Other center	20190730	20190731	295.576	1.86	1000ng	32.87	32.53	34.97	32.76	SCC, high-middle differentiation	CC	SCC
XH0550	66	No	Negative	Positive	Positive	Negative	Other malignancies rather than CC	Inflammation								Ovarian HGSC	9.11	8.47		Negative				20190730	20190731	36.341	1.84	500ng	45	35.89	45	36.53	EOC	Other malignancies rather than CC	Inflammation
XH0551	60	biopsy	Negative	Negative	Negative	Positive	HSIL	CIN1	CIN1	Inflammation/LSIL		HSIL without residual lesions		No			17.99	13.55	ASC-H	51, 68	Other 12		Other center	20190730	20190731	145.689	1.89	1000ng	45	27.01	40.61	27.06	CIN2	HSIL	CIN1
XH0552	65	biopsy	Positive	Positive	Positive	Positive	HSIL	CIN3	CIN3	CIN2+		HSIL with residual lesions		Yes			5.47	5.02	ASCUS	16		18	Other center	20190730	20190731	147.179	1.88	1000ng	32.15	26.68	31.62	26.6	CIN3	HSIL	CIN3
XH0553	27	biopsy	Positive	Positive	Positive	Positive	HSIL	CIN3	CIN3	CIN2+		HSIL with residual lesions		Yes			5.57	5.78	HSIL	16		16	Other center	20190730	20190731	100.768	1.88	1000ng	32.12	26.55	32.32	26.54	CIN3	HSIL	CIN3
XH0555	45	No	Negative	Negative	Negative	Negative	Benign	Inflammation	Inflammation	Inflammation/LSIL	Benign	Benign	Benign				11.96	14.49		Negative				20190730	20190731	122.16	1.89	1000ng	39.36	27.4	41.88	27.39	Uterine leimyoma	Benign	Inflammation
XH0556	46	cone	Positive	Positive	Positive	Positive	HSIL	CIN3	CIN3	CIN2+		HSIL with residual lesions		Yes			4.72	4.93	ASCUS	33		33	Other center	20190730	20190731	406.244	1.93	1000ng	33.67	28.95	33.73	28.8	CIN3	HSIL	CIN3
XH0557	44	cone	Positive	Positive	Positive	Positive	CC	SCC	SCC	CIN2+	SCC with residual lesions			Yes	G2		2.62	2.63		18		18		20190730	20190731	197.787	1.87	1000ng	29.82	27.2	29.6	26.97	SCC, middle differentiation	CC	SCC
XH0558	65	No	Negative	Negative	Negative	Negative	Other malignancies rather than CC	Inflammation								Ovarian HGSC	11.9	12.53		Negative				20190730	20190731	71.414	1.88	1000ng	39.23	27.33	39.51	26.98	EOC	Other malignancies rather than CC	Inflammation
XH0559	56	biopsy	Negative	Negative	Negative	Positive	HSIL	CIN3	CIN3	CIN2+		HSIL with residual lesions		Yes			8.52	10.83	ASCUS	16		16	Other center	20190730	20190731	241.886	1.87	1000ng	34.62	26.1	37.26	26.43	CIN3	HSIL	CIN3
XH0560	23	cone	Negative	Negative	Negative	Positive	CC	Inflammation	Inflammation	Inflammation/LSIL	SCC without residual lesions			No			10.19	9.88	HSIL	16		16, 18, 52, 58	Other center	20190730	20190731	190.893	1.91	1000ng	36.94	26.75	36.83	26.95	SCC	CC	Inflammation
XH0561	46	No	Negative	Negative	Negative	Negative	Benign	CIN1	CIN1	Inflammation/LSIL	Benign	Benign	Benign				13.23	13.68		Negative				20190730	20190731	189.536	1.88	1000ng	39.97	26.74	40.83	27.15	Uterine leimyoma	Benign	CIN1
XH0563	33	biopsy	Negative	Negative	Negative	Positive	HSIL	CIN1	CIN1	Inflammation/LSIL		HSIL without residual lesions		No			18.58	14.53		16		16, 51		20190730	20190731	277.812	1.87	1000ng	45	26.42	41.11	26.58	CIN3	HSIL	CIN1
XH0564	45	biopsy	Negative	Negative	Negative	Positive	HSIL	CIN3	CIN3	CIN2+		HSIL with residual lesions		Yes			17.31	13.59		31		31		20190730	20190807	56.624	1.82	1000ng	45	27.69	41.6	28.01	CIN3	HSIL	CIN3
XH0565	33	biopsy	Negative	Positive	Positive	Positive	HSIL	CIN3	CIN3	CIN2+		HSIL with residual lesions		Yes			11.03	9.13	ASCUS	16		16, 35	Other center	20190730	20190807	59.86	1.82	1000ng	36.94	25.91	35.38	26.25	CIN3	HSIL	CIN3
XH0566	26	cone	Negative	Negative	Negative	Positive	CC	ADC, usual type	ADC, usual type	CIN2+			ADC, usual type		G3		11.99	9.67	HSIL	45		45	Other center	20190730	20190807	185.355	1.87	1000ng	39.11	27.12	37.05	27.38	ADC, low differentiation	CC	ADC, usual type
XH0567	41	No	Positive	Positive	Positive	Negative	Other malignancies rather than CC	Inflammation								Uterine endometrioid carcinoma, G1	7.93	4.61		Negative	Negative			20190730	20190807	41.161	1.84	1000ng	37.7	29.77	35.01	30.4	EC	Other malignancies rather than CC	Inflammation
XH0568	45	biopsy	Negative	Negative	Negative	Negative	HSIL	CIN1	CIN1	Inflammation/LSIL		HSIL without residual lesions		No			9.87	15.03		Negative		45		20190730	20190807	31.901	1.81	1000ng	39.54	29.67	45	29.97	CIN2	HSIL	CIN1
XH0569	62	No	Negative	Negative	Negative	Negative	Benign	Inflammation	Inflammation	Inflammation/LSIL	Benign	Benign	Benign				11.44	12.61		Negative				20190730	20190807	54.611	1.85	1000ng	37.94	26.5	39.3	26.69	Ovarian benign tumor: teratoma	Benign	Inflammation
XH0570	50	biopsy	Positive	Positive	Positive	Positive	CC	SCC	SCC	CIN2+	SCC with residual lesions			Yes	G3		5.95	5.5	ASCUS	58		58	Other center	20190730	20190807	154.013	1.85	1000ng	32.39	26.44	32.1	26.6	SCC, low differentiation	CC	SCC
XH0571	56	No	Negative	Negative	Negative	Negative	Benign	Inflammation	Inflammation	Inflammation/LSIL	Benign	Benign	Benign				17.25	16.88		Negative				20190730	20190807	126.666	1.89	1000ng	45	27.75	45	28.12	Uterine leimyoma	Benign	Inflammation
XH0572	56	No	Negative	Negative	Negative	Negative	Other malignancies rather than CC	Inflammation								Uterine leiomyosarcoma	12.25	10.87	Negative	Negative		Negative	Other center	20190730	20190807	72.5	1.89	1000ng	39.15	26.9	38.03	27.16	Uterine leiomyosarcoma	Other malignancies rather than CC	Inflammation
XH0573	34	biopsy	Negative	Negative	Negative	Positive	HSIL	CIN1	CIN1	Inflammation/LSIL		HSIL without residual lesions		No			16.67	16.52	ASCUS	16		16, 18, 33	Other center	20190730	20190807	157.883	1.85	1000ng	45	28.33	45	28.48	CIN3	HSIL	CIN1
XH0574	32	cone	Negative	Negative	Negative	Negative	HSIL	Inflammation	Inflammation	Inflammation/LSIL		HSIL without residual lesions		No			15.21	14.58	LSIL	Negative		16, 51	Other center	20190730	20190807	24.1	1.83	500ng	45	29.79	45	30.42	CIN3	HSIL	Inflammation
XH0575	49	No	Positive	Positive	Positive	Negative	Other malignancies rather than CC	Inflammation								Uterine endometrioid carcinoma, G1	5.31	4.05	Negative	Negative		Negative	Other center	20190730	20190807	58.656	1.83	1000ng	32.31	27	31.02	26.97	EC	Other malignancies rather than CC	Inflammation
XH0576	53	biopsy	Positive	Positive	Positive	Positive	CC	ADC, usual type	ADC, usual type	CIN2+			ADC, usual type		G3		1.66	1.35		16				20190730	20190807	111.635	1.92	1000ng	28.27	26.61	28.12	26.77	ADC, usual type, middle-low differentiation	CC	ADC, usual type
XH0577	40	biopsy	Negative	Negative	Negative	Negative	HSIL	CIN3	CIN3	CIN2+		HSIL with residual lesions		Yes			8.77	14.36	HSIL	Negative		18	Other center	20190730	20190807	160.774	1.86	1000ng	35.14	26.37	40.92	26.56	CIN3	HSIL	CIN3
XH0578	59	No	Negative	Negative	Negative	Negative	Other malignancies rather than CC	Inflammation								EIN	15.98	13.29		Negative				20190730	20190807	224.118	1.86	1000ng	42.22	26.24	39.85	26.56	EC	Other malignancies rather than CC	Inflammation
XH0579	41	No	Positive	Positive	Positive	Negative	Other malignancies rather than CC	Inflammation								Uterine endometrioid carcinoma, G1	6.78	5.3	Negative	Negative			Study center	20190730	20190807	147.69	1.91	1000ng	33.91	27.13	32.71	27.41	EC	Other malignancies rather than CC	Inflammation
XH0580	63	cone	Negative	Negative	Negative	Positive	CC	Inflammation	Inflammation	Inflammation/LSIL	SCC without residual lesions			No			17.17	14.04	HSIL	16		16	Other center	20190807	20190807	74.263	1.83	1000ng	45	27.83	42.03	27.99	SCC	CC	Inflammation
XH0581	53	No	Positive	Positive	Positive	Negative	Other malignancies rather than CC	Inflammation								Uterine endometrioid carcinoma, G2	4.18	2.7		Negative				20190807	20190807	107.014	1.83	1000ng	30.15	25.97	28.98	26.28	EC	Other malignancies rather than CC	Inflammation
XH0582	72	No	Negative	Negative	Negative	Negative	Other malignancies rather than CC	Inflammation								Ovarian HGSC	13.68	13.28	Negative	Negative	Negative		Study center	20190807	20190807	57.379	1.85	1000ng	39.82	26.14	39.73	26.45	EOC	Other malignancies rather than CC	Inflammation
XH0583	54	cone	Negative	Positive	Positive	Positive	CC	SCC	SCC	CIN2+	SCC with residual lesions			Yes	G2		8.18	6.76	HSIL	16		16	Other center	20190807	20190807	52.214	1.83	1000ng	34.45	26.27	32.98	26.22	SCC, middle differentiation	CC	SCC
XH0584	53	cone	Negative	Negative	Negative	Positive	HSIL	Inflammation	Inflammation	Inflammation/LSIL		HSIL without residual lesions		No			8.43	9.62		16		16		20190807	20190807	210.922	1.83	1000ng	34.52	26.09	35.67	26.05	CIN3	HSIL	Inflammation
XH0585	39	No	Negative	Negative	Negative	Negative	Benign	Inflammation	Inflammation	Inflammation/LSIL	Benign	Benign	Benign				19.18	14.34	Negative	Negative	Negative		Study center	20190807	20190807	67.141	1.8	1000ng	45	25.82	40.23	25.89	Uterine leimyoma	Benign	Inflammation
XH0586	42	biopsy	Negative	Positive	Positive	Positive	HSIL	CIN3	CIN3	CIN2+		HSIL with residual lesions		Yes			8.81	8.01	LSIL	16		16	Other center	20190807	20190807	52.015	1.81	500ng	34.57	25.76	33.84	25.83	CIN2	HSIL	CIN3
XH0587	67	No	Negative	Negative	Negative	Negative	Other malignancies rather than CC	Inflammation								Uterine malignant mixed mullerian tumor	18.71	11.37		Negative				20190917	20190919	46.452	1.81	1000ng	45	26.29	37.75	26.38	Uterine malignant mixed mullerian tumor	Other malignancies rather than CC	Inflammation
XH0588	46	No	Negative	Negative	Negative	Negative	Benign	Inflammation	Inflammation	Inflammation/LSIL	Benign	Benign	Benign				11.38	9.46	Negative	Negative	Negative		Study center	20190917	20190919	28.69	1.85	500ng	38.34	26.96	37	27.54	Uterine leimyoma	Benign	Inflammation
XH0589	44	No	Negative	Negative	Negative	Negative	Benign	Inflammation	Inflammation	Inflammation/LSIL	Benign	Benign	Benign				18.18	18.02		Negative				20190917	20190919	115.107	1.9	1000ng	45	26.82	45	26.98	Adenomyosis	Benign	Inflammation
XH0590	59	cone	Negative	Negative	Negative	Negative	HSIL	Inflammation	Inflammation	Inflammation/LSIL		HSIL without residual lesions		No			17.18	17.09	HSIL	Negative		67	Other center	20190917	20190919	25.259	1.8	500ng	45	27.82	45	27.91	CIN3	HSIL	Inflammation
XH0591	66	No	Negative	Negative	Negative	Negative	Other malignancies rather than CC	Inflammation								Ovarian HGSC	14.8	14.42		Negative				20190917	20190919	65.067	1.83	1000ng	40.16	25.36	40.14	25.72	EOC	Other malignancies rather than CC	Inflammation
XH0592	62	No	Negative	Negative	Negative	Negative	Benign	Inflammation	Inflammation	Inflammation/LSIL	Benign	Benign	Benign				18.42	11.39		Negative				20190917	20190919	77.286	1.91	1000ng	45	26.58	38.22	26.83	Ovarian benign tumor: teratoma	Benign	Inflammation
XH0593	48	cone	Negative	Negative	Negative	Negative	CC	Inflammation	Inflammation	Inflammation/LSIL	SCC without residual lesions			No			12.56	11.86	HSIL	Negative		16, 18	Other center	20190917	20190919	64.622	1.86	1000ng	38.46	25.9	38.13	26.27	SCC	CC	Inflammation
XH0594	34	biopsy	Negative	Negative	Negative	Positive	HSIL	CIN2	CIN2	CIN2+		HSIL with residual lesions		Yes			16.72	14.83		35		35		20190917	20190919	275.078	1.83	1000ng	42.12	25.4	40.5	25.67	CIN3	HSIL	CIN2
XH0595	44	No	Negative	Negative	Negative	Negative	Other malignancies rather than CC	Inflammation								Fallopian tube carcinoma	12.91	11.25		Negative				20190917	20190919	70.906	1.84	1000ng	39.15	26.24	37.36	26.11	EOC	Other malignancies rather than CC	Inflammation
XH0596	56	No	Negative	Negative	Negative	Negative	Other malignancies rather than CC	Inflammation								Uterine endometrioid carcinoma, G1	14.44	9.82		Negative				20190917	20190919	74.506	1.87	1000ng	41.16	26.72	36.48	26.66	EC	Other malignancies rather than CC	Inflammation
XH0597	56	No	Negative	Negative	Negative	Negative	Other malignancies rather than CC	Inflammation								Ovarian HGSC	10.5	14.42		Negative				20190917	20190919	49.887	1.84	1000ng	37.13	26.63	41.42	27	EOC	Other malignancies rather than CC	Inflammation
XH0598	38	No	Negative	Negative	Negative	Negative	Other malignancies rather than CC	Inflammation								EIN	18.69	16.25		Negative				20190917	20190919	84.93	1.82	1000ng	45	26.31	42.95	26.7	EIN	Other malignancies rather than CC	Inflammation
XH0599	41	cone	Negative	Negative	Negative	Positive	CC	ADC, usual type	ADC, usual type	CIN2+			ADC, usual type		G1		8.94	12.11	ASC-H	45		45	Other center	20190917	20190919	266.418	1.85	1000ng	34.83	25.89	38.35	26.24	ADC, usual type, high differentiation	CC	ADC, usual type
XH0600	39	biopsy	Positive	Positive	Positive	Positive	CC	SCC	SCC	CIN2+	SCC with residual lesions			Yes	G3		2.62	2.33		16				20190917	20190919	239.807	1.85	1000ng	28.59	25.97	28.65	26.32	SCC, low differentiation	CC	SCC
XH0601	40	No	Negative	Negative	Negative	Negative	Other malignancies rather than CC	Inflammation								Uterine endometrioid carcinoma, G1	16.1	10.47		Negative				20190917	20190919	167.931	1.82	1000ng	41.89	25.79	36.28	25.81	EC	Other malignancies rather than CC	Inflammation
XH0602	63	No	Negative	Positive	Positive	Positive	Benign	Inflammation	Inflammation	Inflammation/LSIL	Benign	Benign	Benign				8.25	8.74		51, 56				20190917	20190919	162.91	1.84	1000ng	34.17	25.92	34.65	25.91	Uterine leimyoma	Benign	Inflammation
XH0603	40	biopsy	Negative	Negative	Negative	Positive	HSIL	CIN3	CIN3	CIN2+		HSIL with residual lesions		Yes			10.71	9.59	LSIL	35		33	Other center	20190917	20190919	121.795	1.84	1000ng	36.52	25.81	35.57	25.98	CIN3	HSIL	CIN3
XH0604	30	biopsy	Negative	Negative	Negative	Negative	HSIL	CIN3	CIN3	CIN2+		HSIL with residual lesions		Yes			18.58	14.89		Negative		52		20190923	20190924	261.278	1.92	1000ng	45	26.42	41.5	26.61	CIN3	HSIL	CIN3
XH0605	32	cone	Positive	Positive	Positive	Positive	HSIL	CIN3	CIN3	CIN2+		HSIL with residual lesions		Yes			6.58	6.49	HSIL	35			Other center	20190923	20190924	163.331	1.85	1000ng	31.9	25.32	32.18	25.69	CIN3	HSIL	CIN3
XH0606	27	biopsy	Negative	Negative	Negative	Positive	HSIL	CIN3	CIN3	CIN2+		HSIL with residual lesions		Yes			13.71	12.6		16		16		20190923	20190924	266.977	1.9	1000ng	40.25	26.54	39.38	26.78	CIN3	HSIL	CIN3
XH0607	45	cone	Negative	Negative	Negative	Negative	CC	Inflammation	Inflammation	Inflammation/LSIL	SCC without residual lesions			No			11.98	13.46	HSIL	Negative			Other center	20190917	20190919	64.904	1.85	1000ng	38.59	26.61	40.37	26.91	SCC	CC	Inflammation
XH0608	53	No	Negative	Negative	Negative	Negative	Benign	Inflammation	Inflammation	Inflammation/LSIL	Benign	Benign	Benign				10.72	13.28	Negative	Negative		Negative	Other center	20191008	20191012	189.084	1.87	1000ng	36.62	25.9	39.37	26.09	Endometriosis	Benign	Inflammation
XH0609	54	cone	Negative	Positive	Positive	Negative	CC	SCC	SCC	CIN2+	SCC with residual lesions			Yes			10.83	9.2	ASC-H	Negative		16, 18	Other center	20190917	20190919	47.4	1.82	1000ng	36.99	26.16	35.65	26.45	SCC	CC	SCC
XH0610	43	No	Negative	Negative	Negative	Positive	Benign	Inflammation	Inflammation	Inflammation/LSIL	Benign	Benign	Benign				18.94	15.72		66				20191008	20191012	36.567	1.82	1000ng	45	26.06	42.32	26.6	Uterine leimyoma	Benign	Inflammation
XH0611	56	No	Negative	Negative	Negative	Negative	Benign	Inflammation	Inflammation	Inflammation/LSIL	Benign	Benign	Benign				19.36	15.92		Negative				20191008	20191012	42.14	1.81	1000ng	45	25.64	41.85	25.93	Endometrial complex hyperplasia	Benign	Inflammation
XH0612	63	No	Negative	Positive	Positive	Negative	Other malignancies rather than CC	Inflammation								Uterine endometrioid carcinoma, G2	12.37	5.94	Negative	Negative		Negative	Other center	20191008	20191012	109.463	1.87	1000ng	38.51	26.14	32.08	26.14	EC	Other malignancies rather than CC	Inflammation
XH0613	48	No	Negative	Negative	Negative	Negative	Other malignancies rather than CC	Inflammation								EIN	18.23	13.87	Negative	Negative		Negative	Other center	20191008	20191012	148.955	1.88	1000ng	45	26.77	40.89	27.02	EIN	Other malignancies rather than CC	Inflammation
XH0614	44	No	Negative	Negative	Negative	Negative	Benign	Inflammation	Inflammation	Inflammation/LSIL	Benign	Benign	Benign				13.4	14.27		Negative				20191008	20191012	118.639	1.85	1000ng	38.89	25.49	40.03	25.76	Uterine leimyoma	Benign	Inflammation
XH0615	55	cone	Positive	Positive	Positive	Positive	HSIL	CIN3	CIN3	CIN2+		HSIL with residual lesions		Yes			2.55	3.28	HSIL	16		16, 18	Other center	20190923	20190924	58.546	1.86	1000ng	29.33	26.78	30.58	27.3	CIN3	HSIL	CIN3
XH0616	36	biopsy	Positive	Positive	Positive	Positive	CC	SCC	SCC	CIN2+	SCC with residual lesions			Yes	G2		4.84	5.09	Negative	16			Other center	20190917	20190919	192.002	1.82	1000ng	30.18	25.34	30.68	25.59	SCC, middle differentiation	CC	SCC
XH0617	37	biopsy	Positive	Positive	Positive	Positive	HSIL	CIN3	CIN3	CIN2+		HSIL with residual lesions		Yes			5.62	5.63	ASCUS	16		16	Other center	20190923	20190924	73.156	1.85	1000ng	32.08	26.46	32.55	26.92	CIN3	HSIL	CIN3
XH0618	32	cone	Negative	Negative	Negative	Negative	CC	Inflammation	Inflammation	Inflammation/LSIL	SCC without residual lesions			No			16.84	11.18	LSIL	Negative			Other center	20190917	20190919	10.021	1.73	200ng	45	28.16	40.02	28.84	SCC	CC	Inflammation
XH0619	24	biopsy	Negative	Negative	Negative	Positive	HSIL	CIN3	CIN3	CIN2+		HSIL with residual lesions		Yes			17.5	14.82		16		16		20190923	20190924	26.74	1.84	500ng	45	27.5	42.63	27.81	CIN3	HSIL	CIN3
XH0620	56	No	Positive	Positive	Positive	Negative	Other malignancies rather than CC	Inflammation								Uterine endometrioid carcinoma, G1	7.76	7.29		Negative				20191008	20191012	238.274	1.88	1000ng	33.81	26.05	33.67	26.38	EC	Other malignancies rather than CC	Inflammation
XH0621	37	cone	Negative	Negative	Negative	Negative	HSIL	Inflammation	Inflammation	Inflammation/LSIL		HSIL without residual lesions		No			16.56	11.4	HSIL	Negative		16	Other center	20190923	20190924	119.758	1.88	1000ng	44.46	27.9	39.29	27.89	CIN3	HSIL	Inflammation
XH0622	45	biopsy	Negative	Negative	Negative	Positive	CC	ADC in situ	ADC in situ	CIN2+			ADC in situ				10.4	9.57	ASCUS	16		16	Other center	20190917	20190919	59.93	1.82	1000ng	36.58	26.18	35.92	26.35	ADC in situ	CC	ADC in situ
XH0623	67	No	Negative	Negative	Negative	Negative	Other malignancies rather than CC	Inflammation								Uterine endometrioid carcinoma, G2	10.42	10.87		Negative				20191008	20191012	142.735	1.85	1000ng	36.15	25.73	36.85	25.98	EC	Other malignancies rather than CC	Inflammation
XH0624	31	biopsy	Negative	Negative	Negative	Negative	CC	Inflammation	Inflammation	Inflammation/LSIL				No			17.31	13.91		Negative				20190917	20190919	28.462	1.86	500ng	45	27.69	41.74	27.83	ADC, clear cell type	CC	Inflammation
XH0625	43	cone	Negative	Negative	Negative	Negative	CC	Inflammation	Inflammation	Inflammation/LSIL	SCC without residual lesions			No			19.99	12.38	HSIL	Negative		16	Other center	20190917	20190919	285.771	1.84	1000ng	45	25.01	37.69	25.31	SCC	CC	Inflammation
XH0626	54	biopsy	Negative	Negative	Negative	Negative	HSIL	CIN2	CIN2	CIN2+		HSIL with residual lesions		Yes			18.36	14.42	ASCUS	Negative		51, 52, 73	Other center	20190923	20190924	178.324	1.85	1000ng	45	26.64	40.9	26.48	CIN3	HSIL	CIN2
XH0627	54	biopsy	Negative	Positive	Positive	Positive	HSIL	CIN3	CIN3	CIN2+		HSIL with residual lesions		Yes			8.61	6.7	ASC-H	16, 52		16	Other center	20190923	20190924	110.189	1.87	1000ng	35.43	26.82	33.59	26.89	CIN3	HSIL	CIN3
XH0628	52	biopsy	Negative	Positive	Positive	Negative	CC	ADC, usual type	ADC, usual type	CIN2+			ADC, usual type		G1		11.6	5.4	ASCUS	Negative			Other center	20191008	20191012	35.445	1.77	1000ng	37.6	26	31.59	26.19	ADC, usual type, high differentiation	CC	ADC, usual type
XH0629	55	cone	Negative	Negative	Negative	Positive	CC	Inflammation	Inflammation	Inflammation/LSIL	SCC without residual lesions			No			18.51	14.74		39		16, 42		20190917	20190919	64.447	1.88	1000ng	45	26.49	41.53	26.79	SCC	CC	Inflammation
XH0631	60	No	Positive	Negative	Positive	Negative	Other malignancies rather than CC	Inflammation								Ovarian HGSC	6.74	11.2		Negative				20191008	20191012	50.668	1.83	1000ng	33	26.26	37.72	26.52	EOC	Other malignancies rather than CC	Inflammation
XH0632	50	No	Negative	Negative	Negative	Negative	Other malignancies rather than CC	Inflammation								Ovarian HGSC	12.24	12.61		Negative				20191008	20191012	45.839	1.88	1000ng	38.42	26.18	39.03	26.42	EOC	Other malignancies rather than CC	Inflammation
XH0633	45	No	Negative	Negative	Negative	Negative	Other malignancies rather than CC	Inflammation								EIN	12.94	15.59	Negative	Negative		Negative	Other center	20191008	20191012	156.078	1.87	1000ng	39.01	26.07	41.74	26.15	EIN	Other malignancies rather than CC	Inflammation
XH0634	67	No	Negative	Negative	Negative	Negative	Other malignancies rather than CC	Inflammation								Ovarian carcinosarcoma	18.97	15.37		Negative				20191008	20191012	103.05	1.91	1000ng	45	26.03	41.62	26.25	EOC	Other malignancies rather than CC	Inflammation
XH0635	77	No	Negative	Negative	Negative	Negative	Other malignancies rather than CC	Inflammation								Ovarian HGSC	9.96	11.18		Negative				20191008	20191012	164.641	1.86	1000ng	35.82	25.86	37.08	25.9	EOC	Other malignancies rather than CC	Inflammation
XH0636	53	biopsy	Negative	Positive	Positive	Positive	CC	ADC, villoglandular	ADC, villoglandular	CIN2+			ADC, villoglandular				17.81	4.1		18		Negative		20190917	20190919	22.118	1.84	500ng	45	27.19	31.92	27.82	ADC, villoglandular	CC	ADC, villoglandular
XH0637	45	cone	Negative	Negative	Negative	Positive	CC	Inflammation	Inflammation	Inflammation/LSIL	SCC without residual lesions			No			10.07	10.05	Negative	16, 56		16	Other center	20190923	20190924	108.67	1.85	1000ng	36.22	26.15	36.31	26.26	SCC	CC	Inflammation
XH0638	51	No	Negative	Negative	Negative	Negative	Other malignancies rather than CC	Inflammation								Ovarian HGSC	14.3	16.58		Negative				20191008	20191012	39.563	1.88	1000ng	40.5	26.2	42.81	26.23	EOC	Other malignancies rather than CC	Inflammation
XH0639	63	No	Negative	Negative	Negative	Negative	Other malignancies rather than CC	Inflammation								Ovarian HGSC	18.68	15.69		Negative				20191008	20191012	71.028	1.91	1000ng	45	26.32	42.16	26.47	EOC	Other malignancies rather than CC	Inflammation
XH0640	33	cone	Negative	Negative	Negative	Negative	CC	Inflammation	Inflammation	Inflammation/LSIL				No			19.25	12.91		Negative				20190917	20190919	104.928	1.86	1000ng	45	25.75	38.98	26.07	ADC in situ	CC	Inflammation
XH0642	37	cone	Negative	Negative	Negative	Positive	HSIL	Inflammation	Inflammation	Inflammation/LSIL		HSIL without residual lesions		No			8.48	16.27	Negative	16		16	Other center	20190923	20190924	177.193	1.92	1000ng	37.04	28.56	45	28.73	CIN3	HSIL	Inflammation
XH0643	50	biopsy	Negative	Negative	Negative	Negative	HSIL	Inflammation	Inflammation	Inflammation/LSIL		HSIL without residual lesions		No			17.1	12.21	ASCUS	Negative		16	Other center	20190923	20190924	57.708	1.84	1000ng	45	27.9	40.2	27.99	CIN3	HSIL	Inflammation
XH0644	36	biopsy	Positive	Negative	Positive	Positive	HSIL	CIN3	CIN3	CIN2+		HSIL with residual lesions		Yes			7.55	9.84	Negative	16, 68		16	Other center	20190923	20190924	90.659	1.85	1000ng	33.53	25.98	36.1	26.26	CIN3	HSIL	CIN3
XH0645	28	biopsy	Negative	Negative	Negative	Positive	HSIL	CIN3	CIN3	CIN2+		HSIL with residual lesions		Yes			18.46	14.53	ASCUS	16		16	Other center	20190923	20190924	147.482	1.89	1000ng	45	26.54	41.09	26.56	CIN3	HSIL	CIN3
XH0646	32	biopsy	Negative	Negative	Negative	Positive	HSIL	CIN2	CIN2	CIN2+		HSIL with residual lesions		Yes			18.34	14.46	LSIL	52, 56		52, 56	Other center	20190923	20190924	183.805	1.89	1000ng	45	26.66	41.17	26.71	CIN3	HSIL	CIN2
XH0647	37	biopsy	Negative	Negative	Negative	Negative	HSIL	CIN1	CIN1	Inflammation/LSIL		HSIL without residual lesions		No			9.13	14.09	LSIL	Negative			Other center	20190923	20190924	358.485	1.92	1000ng	35.85	26.72	41.1	27.01	CIN3	HSIL	CIN1
XH0648	41	biopsy	Negative	Positive	Positive	Positive	HSIL	CIN3	CIN3	CIN2+		HSIL with residual lesions		Yes			9.94	8.14	LSIL	31		Postiviet without genotyping	Other center	20190917	20190919	81.114	1.86	1000ng	35.44	25.5	33.65	25.51	CIN2	HSIL	CIN3
XH0649	36	biopsy	Positive	Positive	Positive	Positive	CC	SCC	SCC	CIN2+	SCC with residual lesions			Yes	G3		4.49	3.6	HSIL	16		16, 18	Other center	20190917	20190919	73.796	1.88	1000ng	30.26	25.77	29.49	25.89	SCC, low differentiation	CC	SCC
XH0650	45	biopsy	Negative	Negative	Negative	Negative	CC	SCC	SCC	CIN2+	SCC with residual lesions			Yes	G2		8.18	9.64	ASC-H	Negative			Other center	20190917	20190919	183.348	1.86	1000ng	34.03	25.85	35.55	25.91	SCC, middle differentiation	CC	SCC
XH0651	57	No	Negative	Negative	Negative	Negative	Other malignancies rather than CC	Inflammation								Uterine endometrioid carcinoma, G2	11.2	13.02		Negative				20191008	20191012	123.305	1.95	1000ng	37.55	26.35	39.56	26.54	EC	Other malignancies rather than CC	Inflammation
XH0652	54	biopsy	Negative	Negative	Negative	Positive	HSIL	CIN2	CIN2	CIN2+		HSIL with residual lesions		Yes			18.51	11.38	Negative	33		33	Other center	20190917	20190919	161.146	1.92	1000ng	45	26.49	38.03	26.65	CIN2	HSIL	CIN2
XH0653	51	No	Negative	Negative	Negative	Negative	Other malignancies rather than CC	Inflammation								Uterine endometrioid carcinoma, G1	18.8	14.06		Negative				20191008	20191012	24.81	1.78	500ng	45	26.2	40.71	26.65	EC	Other malignancies rather than CC	Inflammation
XH0654	41	biopsy	Positive	Positive	Positive	Positive	CC	SCC	SCC	CIN2+	SCC with residual lesions			Yes	G2		3.04	3.62	ASCUS	16		16	Other center	20190917	20190919	164.135	1.87	1000ng	28.45	25.41	29.29	25.67	SCC, middle differentiation	CC	SCC
XH0655	42	No	Negative	Negative	Negative	Negative	Other malignancies rather than CC	Inflammation								Ovarian HGSC	16.87	14.89		Negative				20191008	20191012	6.337	1.86	500ng	45	28.13	43.27	28.38	EOC	Other malignancies rather than CC	Inflammation
XH0656	50	No	Negative	Negative	Negative	Negative	Other malignancies rather than CC	Inflammation								Ovarian LGSC	18.46	16.37		Negative				20191008	20191012	58.413	1.9	1000ng	45	26.54	43.27	26.9	EOC	Other malignancies rather than CC	Inflammation
XH0657	42	No	Negative	Negative	Negative	Negative	Benign	Inflammation	Inflammation	Inflammation/LSIL	Benign	Benign	Benign				12.48	15.13	Negative	Negative			Study center	20191008	20191012	205.484	1.9	1000ng	38.41	25.93	41.71	26.58	Adenomyosis	Benign	Inflammation
XH0658	39	No	Negative	Negative	Negative	Negative	Benign	Inflammation	Inflammation	Inflammation/LSIL	Benign	Benign	Benign				18.29	11.71	Negative	Negative	Negative		Study center	20191008	20191012	138.535	1.94	1000ng	45	26.71	38.78	27.07	Uterine leimyoma	Benign	Inflammation
XH0659	54	cone	Positive	Positive	Positive	Positive	HSIL	CIN3	CIN3	CIN2+		HSIL with residual lesions		Yes			3.42	2.6	HSIL	16		16	Other center	20190923	20190924	73.529	1.86	1000ng	29.44	26.02	28.65	26.05	CIN3	HSIL	CIN3
XH0660	56	No	Negative	Negative	Negative	Negative	Other malignancies rather than CC	Inflammation								Ovarian borderline tumor, serous type	17.3	14.33	Negative	Negative			Study center	20191008	20191012	21.099	1.82	500ng	45	27.7	42.45	28.12	Ovarian borderline tumor	Other malignancies rather than CC	Inflammation
XH0661	47	No	Negative	Negative	Negative	Negative	Other malignancies rather than CC	Inflammation								Ovarian clear cell carcinoma	18.96	18.5	Negative	Negative	Negative		Study center	20191008	20191012	98.678	1.93	1000ng	45	26.04	45	26.5	EOC	Other malignancies rather than CC	Inflammation
XH0662	33	biopsy	Negative	Negative	Negative	Positive	HSIL	CIN2	CIN2	CIN2+		HSIL with residual lesions		Yes			13.5	11.02	HSIL	16		16, 18, 82	Other center	20190923	20190924	68.472	1.93	1000ng	40.13	26.63	37.74	26.72	CIN3	HSIL	CIN2
XH0663	32	biopsy	Negative	Positive	Positive	Positive	CC	ADC in situ	ADC in situ	CIN2+			ADC in situ				12.43	8.99	Negative	18		16	Other center	20190923	20190924	81.038	1.91	1000ng	38.64	26.21	35.12	26.13	ADC in situ	CC	ADC in situ
XH0664	45	biopsy	Negative	Positive	Positive	Positive	HSIL	CIN3	CIN3	CIN2+		HSIL with residual lesions		Yes			11.15	8.49	ASC-H	58		58	Other center	20190923	20190924	38.497	1.81	1000ng	37.69	26.54	34.83	26.34	CIN3	HSIL	CIN3
XH0665	63	cone	Negative	Negative	Negative	Positive	HSIL	Inflammation	Inflammation	Inflammation/LSIL		HSIL without residual lesions		No			12.09	10.91	HSIL	33		33	Other center	20190923	20190924	99.776	1.85	1000ng	37.36	25.27	36.28	25.37	CIN3	HSIL	Inflammation
XH0666	35	biopsy	Negative	Negative	Negative	Negative	HSIL	Inflammation	Inflammation	Inflammation/LSIL		HSIL without residual lesions		No			16.37	13.98	ASCUS	Negative			Other center	20190917	20190919	102.691	1.98	1000ng	43.9	27.53	41.73	27.75	CIN3	HSIL	Inflammation
XH0667	41	biopsy	Positive	Positive	Positive	Positive	CC	SCC	SCC	CIN2+	SCC with residual lesions			Yes	G2		3.53	3.62	HSIL	16		Postiviet without genotyping	Other center	20190917	20190919	172.864	1.83	1000ng	28.9	25.37	29.42	25.8	SCC, middle differentiation	CC	SCC
XH0668	41	No	Negative	Negative	Negative	Negative	Benign	Inflammation	Inflammation	Inflammation/LSIL	Benign	Benign	Benign				10.99	12.97	Negative	Negative		Negative	Other center	20191008	20191012	17.563	1.89	500ng	38.01	27.02	40.29	27.32	Uterine leimyoma	Benign	Inflammation
XH0669	43	biopsy	Negative	Negative	Negative	Negative	HSIL	CIN2	CIN2	CIN2+		HSIL with residual lesions		Yes			14.45	17.05	ASCUS	Negative		16, 58	Other center	20190923	20190924	151.513	1.86	1000ng	40.52	26.07	43.13	26.08	CIN3	HSIL	CIN2
XH0670	32	biopsy	Negative	Negative	Negative	Positive	HSIL	CIN3	CIN3	CIN2+		HSIL with residual lesions		Yes			8.49	11.55	Negative	16		16	Other center	20190923	20190924	59.976	1.8	1000ng	34.16	25.67	37.16	25.61	CIN3	HSIL	CIN3
XH0671	45	biopsy	Negative	Negative	Negative	Positive	HSIL	Inflammation	Inflammation	Inflammation/LSIL		HSIL without residual lesions		No			13.61	11.12	ASCUS	16		16	Other center	20190923	20190924	75.323	1.89	1000ng	39.56	25.95	36.86	25.74	CIN3	HSIL	Inflammation

## Sheet: Code
	Category: major diagnosis	Cateogory: actural cervical pathology	Cateogory: actural cervical pathology withouth other maligancies	Catogory: CIN2+	Category: SCC	Category: ADC	Category: HSIL
1	Benign	Inflammation	Inflammation	Inflammation/LSIL	Benign	Benign	Benign
2	HSIL	CIN1	CIN1	CIN2+	SCC without residual lesions	ADC, villoglandular	HSIL without residual lesions
3	CC	CIN2	CIN2		SCC with residual lesions	ADC in situ	HSIL with residual lesions
4	Other malignancies rather than CC	CIN3	CIN3			ADC, usual type
5		SCC	SCC
6		ADC, villoglandular	ADC, villoglandular
7		ADC in situ	ADC in situ
8		ADC, usual type	ADC, usual type
		Excluding: 1 melanoma, 1 endometrial clear cell carcinoma, 1 endocervical mucinous adenocarcinoma
